# Supplementary material for: Effect of Chitosan and Alginate-Based Edible Membranes with Oregano Essential Oil and Olive Oil in the Microbiological, Physicochemical and Organoleptic Characteristics of Mutton
Source: MDPI journal article supplement (doi:10.3390/microorganisms11020507), 2023-02-17
Supplement: s1 [file s1]

**Supplementary Table S2.** Mean populations (in log<sub>10</sub> cfu/gr) of Total Mesophilic Counts, Total Psychrophilic Counts, *Brochothrix thermosphacta* and Lactic Acid Bacteria in meat pieces from thigh region (standard deviation in parenthesis).

| Lot                     | Storage<br>(Days) | Treatment                       |                                  |                                |                                 |                                 |                                 |                                |                                  |                                 |                                |                                | Sig. |
|-------------------------|-------------------|---------------------------------|----------------------------------|--------------------------------|---------------------------------|---------------------------------|---------------------------------|--------------------------------|----------------------------------|---------------------------------|--------------------------------|--------------------------------|------|
|                         |                   | Co                              | Ch                               | Ch + or                        | Ch + va                         | Ch + or +<br>va                 | Va                              | Al                             | Al + or                          | Al + va                         | Al + or +<br>va                | Al + ol +<br>va                |      |
| TMC                     | 0                 | 5.18<br>(0.20) <sup>Aa</sup>    | 5.18<br>(0.2) <sup>Aab</sup>     | 5.18<br>(0.20) <sup>Aab</sup>  | 5.18<br>(0.20) <sup>Aab</sup>   | 5.18<br>(0.20) <sup>Aab</sup>   | 5.18<br>(0.20) <sup>Aa</sup>    | 5.18<br>(0.20) <sup>Aa</sup>   | 5.18<br>(0.20) <sup>Aa</sup>     | 5.18<br>(0.20) <sup>Aa</sup>    | 5.18<br>(0.20) <sup>Aa</sup>   | 5.18<br>(0.20) <sup>Aa</sup>   | NS   |
|                         | 1                 | 6.80<br>(1.49) <sup>Aab</sup>   | 4.21<br>(0.70) <sup>Aa</sup>     | 5.40<br>(1.20) <sup>Aab</sup>  | 5.63<br>(0.79) <sup>Aab</sup>   | 4.87<br>(0.04) <sup>Aab</sup>   | 5.47<br>(0.01) <sup>Aab</sup>   | 5.60<br>(0.15) <sup>Aa</sup>   | 6.46<br>(0.56) <sup>Aab</sup>    | 6.06<br>(0.19) <sup>Ab</sup>    | 5.87<br>(0.04) <sup>Aab</sup>  | 6.00<br>(0.01) <sup>Aab</sup>  | NS   |
|                         | 3                 | 6.60<br>(0.59) <sup>ABCab</sup> | 5.23<br>(0.61) <sup>ABab</sup>   | 4.74<br>(0.30) <sup>Aa</sup>   | 4.81<br>(0.36) <sup>Aa</sup>    | 5.19<br>(1.04) <sup>Aa</sup>    | 6.69<br>(0.42) <sup>ABCbc</sup> | 6.39<br>(0.12) <sup>ABCb</sup> | 6.95<br>(0.06) <sup>BCb</sup>    | 6.17<br>(0.21) <sup>ABCb</sup>  | 7.37<br>(0.53) <sup>Cab</sup>  | 7.47<br>(0.49) <sup>Cbc</sup>  | *    |
|                         | 7                 | 5.70<br>(1.41) <sup>Aa</sup>    | 5.30<br>(0.33) <sup>Aab</sup>    | 5.87<br>(0.21) <sup>Aab</sup>  | 5.96<br>(0.12) <sup>Aab</sup>   | 5.95<br>(0.06) <sup>Aab</sup>   | 5.60<br>(0.01) <sup>Aab</sup>   | 6.60<br>(0.15) <sup>Abc</sup>  | 7.34<br>(0.70) <sup>Ab</sup>     | 6.77<br>(0.01) <sup>Ac</sup>    | 7.32<br>(0.91) <sup>Aab</sup>  | 7.00<br>(0.01) <sup>Abc</sup>  | NS   |
|                         | 14                | 6.00<br>(0.01) <sup>ABab</sup>  | 5.74<br>(0.17) <sup>Abc</sup>    | 6.92<br>(0.61) <sup>ABab</sup> | 6.69<br>(0.42) <sup>ABb</sup>   | 6.84<br>(0.08) <sup>ABb</sup>   | 6.53<br>(0.61) <sup>ABabc</sup> | 7.14<br>(0.28) <sup>ABc</sup>  | 7.14<br>(0.28) <sup>ABb</sup>    | 6.90<br>(0.01) <sup>ABc</sup>   | 7.54<br>(0.55) <sup>Bb</sup>   | 7.44<br>(0.65) <sup>ABbc</sup> | *    |
|                         | 21                | 7.17<br>(0.21) <sup>ABb</sup>   | 7.17<br>(0.21) <sup>ABc</sup>    | 7.17<br>(0.21) <sup>ABb</sup>  | 6.74<br>(0.05) <sup>ABb</sup>   | 6.21<br>(0.70) <sup>Aab</sup>   | 6.95<br>(0.06) <sup>ABc</sup>   | 6.97<br>(0.03) <sup>ABbc</sup> | 7.09<br>(0.42) <sup>ABb</sup>    | 6.81<br>(0.14) <sup>ABc</sup>   | 7.75<br>(0.58) <sup>Bb</sup>   | 8.00<br>(0.01) <sup>Bc</sup>   | **   |
| Sig.                    |                   | ***                             | ***                              | ***                            | ***                             | *                               | ***                             | ***                            | ***                              | ***                             | ***                            | ***                            |      |
| TPC                     | 0                 | 5.00<br>(0.01) <sup>Aa</sup>    | 5.00<br>(0.01) <sup>Aab</sup>    | 5.00<br>(0.01) <sup>Aab</sup>  | 5.00<br>(0.01) <sup>Aa</sup>    | 5.00<br>(0.01) <sup>Aa</sup>    | 5.00<br>(0.01) <sup>Aa</sup>    | 5.00<br>(0.01) <sup>Aa</sup>   | 5.00<br>(0.01) <sup>Aa</sup>     | 5.00<br>(0.01) <sup>Aa</sup>    | 5.00<br>(0.01) <sup>Aa</sup>   | 5.00<br>(0.01) <sup>Aa</sup>   | NS   |
|                         | 1                 | 7.00<br>(1.50) <sup>Aab</sup>   | 4.17<br>(0.21) <sup>Aa</sup>     | 4.74<br>(0.70) <sup>Aa</sup>   | 5.77<br>(0.49) <sup>Aab</sup>   | 5.70<br>(1.20) <sup>Aab</sup>   | 5.90<br>(0.15) <sup>Ab</sup>    | 5.90<br>(0.01) <sup>Ab</sup>   | 6.69<br>(0.67) <sup>Ab</sup>     | 6.30<br>(0.15) <sup>Ab</sup>    | 6.13<br>(0.32) <sup>Ab</sup>   | 6.00<br>(0.01) <sup>Ab</sup>   | NS   |
|                         | 3                 | 7.30<br>(0.01) <sup>Cab</sup>   | 6.19<br>(0.91) <sup>ABCabc</sup> | 5.09<br>(0.42) <sup>ABab</sup> | 5.31<br>(1.00) <sup>Aa</sup>    | 6.61<br>(1.00) <sup>ABCab</sup> | 6.95<br>(0.06) <sup>ABCcd</sup> | 7.14<br>(0.28) <sup>BCc</sup>  | 7.39<br>(0.12) <sup>Cbc</sup>    | 6.69<br>(0.01) <sup>ACb</sup>   | 7.69<br>(0.12) <sup>Cc</sup>   | 7.95<br>(0.06) <sup>Cc</sup>   | **   |
|                         | 7                 | 7.17<br>(0.21) <sup>ABab</sup>  | 6.38<br>(0.49) <sup>Abc</sup>    | 6.51<br>(0.04) <sup>Abc</sup>  | 6.67<br>(0.23) <sup>Aabc</sup>  | 7.09<br>(0.12) <sup>ABab</sup>  | 6.84<br>(0.08) <sup>Ac</sup>    | 7.84<br>(0.08) <sup>BCd</sup>  | 8.30<br>(0.33) <sup>Ccd</sup>    | 7.84<br>(0.28) <sup>BCc</sup>   | 8.30<br>(0.01) <sup>Ccd</sup>  | 8.17<br>(0.21) <sup>Ccd</sup>  | ***  |
|                         | 14                | 7.39<br>(0.42) <sup>Aab</sup>   | 7.30<br>(0.33) <sup>Ac</sup>     | 7.45<br>(0.63) <sup>ABCc</sup> | 7.65<br>(0.06) <sup>ABCDc</sup> | 7.69<br>(0.12) <sup>ABCDb</sup> | 7.39<br>(0.12) <sup>ABd</sup>   | 8.54<br>(0.08) <sup>De</sup>   | 8.30<br>(0.01) <sup>ABCDcd</sup> | 7.90<br>(0.15) <sup>ABCDc</sup> | 8.45<br>(0.21) <sup>BCDd</sup> | 8.47<br>(0.01) <sup>CDd</sup>  | *    |
|                         | 21                | 9.70<br>(1.41) <sup>Ab</sup>    | 8.17<br>(0.21) <sup>Ad</sup>     | 7.69<br>(0.42) <sup>Ac</sup>   | 7.27 (0.4)<br>Abc               | 7.54<br>(0.28) <sup>Aab</sup>   | 7.47<br>(0.21) <sup>Ad</sup>    | 8.3<br>(0.01) <sup>Ade</sup>   | 8.65<br>(0.06) <sup>Ad</sup>     | 8.17<br>(0.21) <sup>Ac</sup>    | 8.47<br>(0.21) <sup>Ad</sup>   | 8.39<br>(0.21) <sup>Ad</sup>   | NS   |
| Sig.                    |                   | ***                             | ***                              | ***                            | ***                             | ***                             | ***                             | ***                            | ***                              | ***                             | ***                            | ***                            |      |
| <i>B. thermosphacta</i> | 0                 | 4.52<br>(0.13) <sup>Aa</sup>    | 4.52<br>(0.13) <sup>Aab</sup>    | 4.52<br>(0.13) <sup>Aa</sup>   | 4.52<br>(0.13) <sup>Aa</sup>    | 4.52<br>(0.13) <sup>Aa</sup>    | 4.52<br>(0.13) <sup>Aa</sup>    | 4.52<br>(0.13) <sup>Aa</sup>   | 4.52<br>(0.13) <sup>Aa</sup>     | 4.52<br>(0.13) <sup>Aab</sup>   | 4.52<br>(0.13) <sup>Aa</sup>   | 4.52<br>(0.13) <sup>Aa</sup>   | NS   |
|                         | 1                 | 4.47<br>(0.49) <sup>Aa</sup>    | 3.43<br>(0.30) <sup>Aa</sup>     | 4.24<br>(1.58) <sup>Aa</sup>   | 4.32<br>(0.91) <sup>Aa</sup>    | 4.34<br>(0.70) <sup>Aa</sup>    | 4.74<br>(0.05) <sup>Aa</sup>    | 5.02<br>(0.28) <sup>Aab</sup>  | 4.77<br>(0.49) <sup>Aa</sup>     | 4.30<br>(0.33) <sup>Aa</sup>    | 5.06<br>(0.08) <sup>Aab</sup>  | 4.00<br>(0.01) <sup>Ab</sup>   | NS   |

|      |    |                                |                                |                                |                               |                                |                               |                               |                                |                                 |                                 |                                |     |
|------|----|--------------------------------|--------------------------------|--------------------------------|-------------------------------|--------------------------------|-------------------------------|-------------------------------|--------------------------------|---------------------------------|---------------------------------|--------------------------------|-----|
| Sig. | 3  | 5.39<br>(0.12) <sup>ABab</sup> | 4.72<br>(0.81) <sup>ABab</sup> | 3.77<br>(0.21) <sup>Aa</sup>   | 3.95<br>(0.06) <sup>ABa</sup> | 5.30<br>(1.41) <sup>ABa</sup>  | 4.90<br>(0.15) <sup>ABa</sup> | 6.02<br>(0.14) <sup>Bbc</sup> | 6.09<br>(0.42) <sup>Bab</sup>  | 5.17<br>(0.21) <sup>ABbc</sup>  | 4.87<br>(0.04) <sup>ABab</sup>  | 5.30<br>(0.01) <sup>ABc</sup>  | *   |
|      | 7  | 6.17<br>(0.21) <sup>DEab</sup> | 4.24<br>(0.28) <sup>Aab</sup>  | 5.47<br>(0.10) <sup>BCDa</sup> | 4.54<br>(0.08) <sup>ABa</sup> | 4.97<br>(0.40) <sup>ABCa</sup> | 4.84<br>(0.08) <sup>ABa</sup> | 6.90<br>(0.01) <sup>Ec</sup>  | 6.67<br>(0.51) <sup>DEb</sup>  | 6.00<br>(0.01) <sup>CDEd</sup>  | 6.36<br>(0.58) <sup>DEc</sup>   | 5.69<br>(0.12) <sup>CDcd</sup> | *** |
|      | 14 | 6.87<br>(1.41) <sup>Aab</sup>  | 5.57<br>(0.12) <sup>Abc</sup>  | 6.26<br>(0.44) <sup>Aa</sup>   | 4.00<br>(0.01) <sup>Aa</sup>  | 5.02<br>(0.91) <sup>Aa</sup>   | 5.30<br>(0.01) <sup>Ab</sup>  | 6.30<br>(0.85) <sup>Abc</sup> | 5.75<br>(0.58) <sup>Aab</sup>  | 6.00<br>(0.12) <sup>Ad</sup>    | 5.69<br>(0.01) <sup>Abc</sup>   | 5.39<br>(0.01) <sup>Ac</sup>   | NS  |
|      | 21 | 8.71<br>(1.07) <sup>Db</sup>   | 6.17<br>(0.21) <sup>BCc</sup>  | 6.02<br>(0.28) <sup>BCa</sup>  | 4.00<br>(0.01) <sup>Aa</sup>  | 5.02<br>(0.91) <sup>ABa</sup>  | 6.24<br>(0.08) <sup>BCc</sup> | 6.60<br>(0.01) <sup>CDc</sup> | 6.24<br>(0.55) <sup>BCab</sup> | 5.81<br>(0.14) <sup>ABCcd</sup> | 5.69<br>(0.12) <sup>ABCbc</sup> | 5.90<br>(0.15) <sup>ABCd</sup> | *** |
|      |    | ***                            | ***                            | ***                            | NS                            | NS                             | **                            | ***                           | ***                            | ***                             | ***                             | **                             |     |
| LAB  | 0  | 2.00<br>(0.01) <sup>Aa</sup>   | 2.00<br>(0.01) <sup>Aa</sup>   | 2.00<br>(0.01) <sup>Aa</sup>   | 2.00<br>(0.01) <sup>Aa</sup>  | 2.00<br>(0.01) <sup>Aa</sup>   | 2.00<br>(0.01) <sup>Aa</sup>  | 2.00<br>(0.01) <sup>Aa</sup>  | 2.00<br>(0.01) <sup>Aa</sup>   | 2.00<br>(0.01) <sup>Aa</sup>    | 2.00<br>(0.01) <sup>Aa</sup>    | 2.00<br>(0.01) <sup>Aa</sup>   | NS  |
|      | 1  | 3.55<br>(0.49) <sup>ABb</sup>  | 2.00<br>(0.01) <sup>Aa</sup>   | 2.00<br>(0.01) <sup>Aa</sup>   | 2.00<br>(0.01) <sup>Aa</sup>  | 2.00<br>(0.01) <sup>Aa</sup>   | 2.00<br>(0.01) <sup>Aa</sup>  | 2.87<br>(0.04) <sup>ABb</sup> | 3.81<br>(0.14) <sup>Bb</sup>   | 3.02<br>(0.91) <sup>ABabc</sup> | 2.74<br>(0.70) <sup>ABa</sup>   | 3.90<br>(0.01) <sup>Bb</sup>   | *   |
|      | 3  | 3.84<br>(0.18) <sup>BCbc</sup> | 2.00<br>(0.01) <sup>Aa</sup>   | 2.00<br>(0.01) <sup>Aa</sup>   | 2.00<br>(0.01) <sup>Aa</sup>  | 2.00<br>(0.01) <sup>Aa</sup>   | 3.77<br>(0.10) <sup>BCb</sup> | 3.54<br>(0.28) <sup>Bc</sup>  | 3.81<br>(0.14) <sup>BCb</sup>  | 2.23<br>(0.33) <sup>Aab</sup>   | 3.92<br>(0.03) <sup>BCb</sup>   | 4.17<br>(0.01) <sup>Cb</sup>   | *** |
|      | 7  | 3.54<br>(0.08) <sup>Ab</sup>   | 4.20<br>(0.76) <sup>Ab</sup>   | 3.81<br>(0.36) <sup>Ab</sup>   | 3.81<br>(0.36) <sup>Ab</sup>  | 3.87<br>(0.21) <sup>Ab</sup>   | 3.87<br>(0.21) <sup>Ab</sup>  | 3.77<br>(0.21) <sup>Ac</sup>  | 4.65<br>(0.63) <sup>Abc</sup>  | 4.00<br>(0.01) <sup>Abcd</sup>  | 4.54<br>(0.28) <sup>Ab</sup>    | 4.00<br>(0.01) <sup>Ab</sup>   | NS  |
|      | 14 | 4.54<br>(0.08) <sup>Ac</sup>   | 4.50<br>(0.14) <sup>Ab</sup>   | 4.65<br>(0.63) <sup>Ab</sup>   | 4.24<br>(0.08) <sup>Ab</sup>  | 4.74<br>(0.05) <sup>Ac</sup>   | 4.47<br>(0.49) <sup>Abc</sup> | 4.04<br>(0.11) <sup>Ac</sup>  | 4.95<br>(0.29) <sup>Abc</sup>  | 4.69<br>(0.01) <sup>Ad</sup>    | 4.92<br>(0.10) <sup>Abc</sup>   | 4.69<br>(0.01) <sup>Ac</sup>   | NS  |
|      | 21 | 5.14<br>(0.28) <sup>ABd</sup>  | 4.84<br>(0.28) <sup>ABb</sup>  | 5.81<br>(0.04) <sup>Bc</sup>   | 5.65<br>(0.06) <sup>ABc</sup> | 5.09<br>(0.12) <sup>ABc</sup>  | 5.11<br>(0.36) <sup>ABc</sup> | 5.17<br>(0.01) <sup>ABd</sup> | 5.14<br>(0.28) <sup>ABc</sup>  | 4.74<br>(0.70) <sup>Accd</sup>  | 5.84<br>(0.08) <sup>Bc</sup>    | 5.17<br>(0.21) <sup>ABd</sup>  | *   |
|      |    | ***                            | ***                            | ***                            | ***                           | ***                            | ***                           | ***                           | ***                            | ***                             | ***                             | ***                            |     |

Treatment: Co: Control; Ch: Chitosan; Ch + or: Chitosan + oregano; Ch + va: Chitosan + vacuum; Ch + or + va: Chitosan + oregano + vacuum; Va: Vacuum; Al: Alginate; Al + or: Alginate + oregano; Al + va: Alginate + vacuum; Al + or + va: Alginate + oregano + vacuum; Al + ol + va: Alginate + olive + vacuum.

<sup>A-E</sup> Mean values in the same row (corresponding to the same days of storage) not followed by a common uppercase letter differ significantly ( $p$ -value < 0.05).

<sup>a-e</sup> Mean values in the same column (corresponding to the same treatment) not followed by a common lowercase letter differ significantly ( $p$ -value < 0.05).

\*  $p$ -value < 0.05; \*\*  $p$ -value < 0.01; \*\*\*  $p$ -value < 0.001; <sup>NS</sup> no significance ( $p$ -value > 0.05).
