# Supplementary material for: Effect of Chitosan and Alginate-Based Edible Membranes with Oregano Essential Oil and Olive Oil in the Microbiological, Physicochemical and Organoleptic Characteristics of Mutton
Source: MDPI journal article supplement (doi:10.3390/microorganisms11020507), 2023-02-17
Supplement: s1 [file s1]

**Supplementary Table S3.** Mean colour values of meat pieces from shoulder area(standard deviation in parenthesis).

| Lot | Storage<br>(Days) | Treatment            |                       |                      |                      |                      |                      |                      |                      |                      |                      |                      | Sig. |
|-----|-------------------|----------------------|-----------------------|----------------------|----------------------|----------------------|----------------------|----------------------|----------------------|----------------------|----------------------|----------------------|------|
|     |                   | Co                   | Ch                    | Ch + Or              | Ch + Va              | Ch + Or<br>+ Va      | Va                   | Al                   | Al + Or              | Al + Va              | Al + Or +<br>Va      | Al + Ol +<br>Va      |      |
| L*  | 0                 | 38.32<br>(3.52) Aa   | 38.32<br>(3.52) Aa    | 38.32<br>(3.52) Aa   | 38.32<br>(3.52) Aa   | 38.32<br>(3.52) Aa   | 38.32<br>(3.52) Aa   | 38.32<br>(3.52) Aab  | 38.32<br>(3.52) Aa   | 38.32<br>(3.52) Aa   | 38.32<br>(3.52) Aa   | 38.32<br>(3.52) Aa   | NS   |
|     | 1                 | 46.47<br>(0.19) BCc  | 50.42<br>(0.14) CDd   | 52.2<br>(4.85) DEb   | 47.77<br>(0.38) BCDb | 56.1<br>(5.21) Ec    | 43.93<br>(0.42) ABb  | 40.87<br>(0.45) Abc  | 50.98<br>(0.63) CDc  | 43.47<br>(1.18) ABb  | 49.64<br>(0.03) CDc  | 46.76<br>(0.23) BCbc | ***  |
|     | 3                 | 40.14<br>(0.04) Aab  | 49.19<br>(2.49) CDcd  | 55.40<br>(0.25) Eb   | 46.75<br>(0.85) BCb  | 49.93<br>(5.74) CDbc | 42.78<br>(0.24) ABb  | 41.66<br>(0.31) Abc  | 41.31<br>(0.66) Aa   | 52.77<br>(0.63) DEc  | 44.01<br>(0.35) ABb  | 49.03<br>(0.89) CDc  | ***  |
|     | 7                 | 46.68<br>(0.12) EFc  | 44.72<br>(0.48) CDEbc | 38.58<br>(2.37) Aa   | 50.77<br>(0.76) Gb   | 48<br>(0.29) Fbc     | 43.18<br>(0.98) Cb   | 43.92<br>(0.01) CDc  | 45.30<br>(0.40) CDEb | 41.10<br>(1.32) Bab  | 45.48<br>(0.12) DEb  | 39.61<br>(0.19) ABa  | ***  |
|     | 14                | 43.6<br>(0.07) Cbc   | 53.69<br>(1.42) Fd    | 38.55<br>(0.72) Aa   | 47.01<br>(1.20) Db   | 52.22<br>(0.38) Ebc  | 43.23<br>(0.18) Cb   | 42.15<br>(0.19) Cc   | 46.86<br>(0.40) Db   | 40.29<br>(0.26) Bab  | 42.86<br>(0.42) Cb   | 39.58<br>(0.18) ABa  | ***  |
|     | 21                | 40.99<br>(0.16) BCab | 44.25<br>(0.17) Efb   | 53.64<br>(0.01) Hb   | 42.15<br>(1.49) CDa  | 44.18<br>(0.53) EFab | 40.23<br>(0.84) Bab  | 37.13<br>(0.40) Aa   | 37.57<br>(0.57) Aa   | 49.14<br>(1.14) Gc   | 45.19<br>(0.55) Fb   | 43.39<br>(0.12) DEb  | ***  |
|     | Sig.              | ***                  | ***                   | ***                  | ***                  | ***                  | *                    | ***                  | ***                  | ***                  | *                    | ***                  |      |
| a*  | 0                 | 21.54<br>(1.18) Ac   | 21.54<br>(1.18) Aa    | 21.54<br>(1.18) Ad   | 21.54<br>(1.18) Aa   | 21.54<br>(1.18) Ad   | 21.54<br>(1.18) Abc  | 21.54<br>(1.18) Ae   | 21.54<br>(1.18) Ae   | 21.54<br>(1.18) Ac   | 21.54<br>(1.18) Abc  | 21.54<br>(1.18) Ab   | NS   |
|     | 1                 | 21.10<br>(0.98) BCc  | 11.57<br>(0.19) Ab    | 32.30<br>(2.38) Ee   | 22.79<br>(0.01) CDa  | 24.64<br>(1.33) De   | 20.78<br>(0.58) BCbc | 20.79<br>(0.60) BCde | 13.03<br>(0.21) Aa   | 23.35<br>(0.62) Dd   | 18.99<br>(0.37) Bab  | 20.62<br>(0.40) BCb  | ***  |
|     | 3                 | 16.60<br>(0.11) Ba   | 14.51<br>(1.27) Ac    | 13.88<br>(0.74) Ab   | 17.74<br>(0.55) BCb  | 12.94<br>(1.30) Ab   | 19.82<br>(0.10) CDb  | 19.53<br>(0.08) CDcd | 20.20<br>(0.24) Dd   | 18.58<br>(0.31) BCda | 18.58<br>(1.83) BCda | 24.98<br>(1.18) Ec   | ***  |
|     | 7                 | 17.92<br>(0.43) Ca   | 14.8<br>(0.20) Ac     | 16.65<br>(0.04) BCbc | 16.86<br>(1.88) BCb  | 16.85<br>(0.1) BCc   | 22.06<br>(1.03) Dc   | 16.78<br>(0.36) BCb  | 15.53<br>(0.03) ABbc | 20.46<br>(0.84) Dbc  | 28.38<br>(0.12) Fd   | 25.59<br>(0.26) Ecd  | ***  |
|     | 14                | 18.23<br>(0.91) Eab  | 12.10<br>(0.53) Bb    | 17.21<br>(0.34) Dc   | 17.41<br>(0.72) DEb  | 9.57<br>(0.05) Aa    | 17.08<br>(0.01) Da   | 15.18<br>(0.08) Ca   | 16.69<br>(0.23) Dc   | 23.59<br>(0.08) Fd   | 22.94<br>(0.36) Fc   | 26.88<br>(0.36) Gd   | ***  |
|     | 21                | 20.04<br>(0.14) EFbc | 18.49<br>(0.09) DEd   | 9.57<br>(0.31) Aa    | 16.92<br>(1.08) Cb   | 16.01<br>(0.01) BCc  | 20.31<br>(0.54) Fbc  | 18.92<br>(0.17) DEFc | 15.21<br>(0.33) Bb   | 19.60<br>(0.15) EFab | 16.51<br>(1.74) BCa  | 17.49<br>(0.04) CDa  | ***  |
|     | Sig.              | ***                  | ***                   | ***                  | ***                  | ***                  | ***                  | ***                  | ***                  | ***                  | ***                  | ***                  |      |
| b*  | 0                 | 7.61<br>(0.20) Ac    | 7.61<br>(0.20) Abc    | 7.61<br>(0.20) Ab    | 7.61<br>(0.20) Aa    | 7.61<br>(0.20) Ac    | 7.61<br>(0.20) Ac    | 7.61<br>(0.20) Ad    | 7.61<br>(0.20) Ad    | 7.61<br>(0.20) Aa    | 7.61<br>(0.20) Aa    | 7.61<br>(0.20) Aa    | NS   |

|                |    |                                |                                |                                 |                                |                                 |                                |                                 |                                 |                                 |                                |                                |     |
|----------------|----|--------------------------------|--------------------------------|---------------------------------|--------------------------------|---------------------------------|--------------------------------|---------------------------------|---------------------------------|---------------------------------|--------------------------------|--------------------------------|-----|
|                | 1  | 9.48<br>(0.12) <sup>DEd</sup>  | 8.23<br>(0.09) <sup>BCDc</sup> | 14.73<br>(1.56) <sup>Gc</sup>   | 7.84<br>(0.16) <sup>BCa</sup>  | 12.07<br>(0.77) <sup>Fd</sup>   | 7.14<br>(0.31) <sup>Bbc</sup>  | 7.72<br>(0.65) <sup>BCd</sup>   | 3.90<br>(0.14) <sup>Ab</sup>    | 9.18<br>(0.59) <sup>CDEb</sup>  | 10.28<br>(0.01) <sup>Eb</sup>  | 9.43<br>(0.41) <sup>DEb</sup>  | *** |
|                | 3  | 3.16<br>(0.18) <sup>Aa</sup>   | 9.45<br>(0.28) <sup>Ed</sup>   | 5.06<br>(1.17) <sup>Ba</sup>    | 7.62<br>(1.04) <sup>Da</sup>   | 4.79<br>(0.04) <sup>Ba</sup>    | 5.88<br>(0.16) <sup>BCb</sup>  | 6.53<br>(0.19) <sup>CDc</sup>   | 7.28<br>(0.43) <sup>Dd</sup>    | 10.64<br>(0.86) <sup>Ec</sup>   | 10.23<br>(0.09) <sup>Eb</sup>  | 15.35<br>(0.53) <sup>Fe</sup>  | *** |
|                | 7  | 9.86<br>(0.01) <sup>Fd</sup>   | 6.17<br>(0.02) <sup>Ba</sup>   | 6.37<br>(0.02) <sup>BCab</sup>  | 7.60<br>(0.98) <sup>DEa</sup>  | 7.42<br>(0.13) <sup>CDEbc</sup> | 6.43<br>(0.87) <sup>BCbc</sup> | 6.74<br>(0.19) <sup>BCDc</sup>  | 4.77<br>(0.08) <sup>Ac</sup>    | 8.17<br>(0.58) <sup>Eab</sup>   | 13.63<br>(0.24) <sup>Hc</sup>  | 12.47<br>(0.09) <sup>Gd</sup>  | *** |
|                | 14 | 7.78<br>(0.98) <sup>Cc</sup>   | 7.28<br>(0.45) <sup>Cb</sup>   | 6.16<br>(0.20) <sup>Bab</sup>   | 7.81<br>(0.28) <sup>Ca</sup>   | 5.47<br>(0.02) <sup>Ba</sup>    | 3.80<br>(0.92) <sup>Aa</sup>   | 5.73<br>(0.02) <sup>Bb</sup>    | 4.42<br>(0.21) <sup>Abc</sup>   | 9.23<br>(0.01) <sup>Db</sup>    | 7.31<br>(0.24) <sup>Ca</sup>   | 10.8<br>(0.29) <sup>Ebc</sup>  | *** |
|                | 21 | 6.45<br>(0.16) <sup>Cb</sup>   | 5.96<br>(0.19) <sup>Ca</sup>   | 4.63<br>(0.89) <sup>Ba</sup>    | 4.42<br>(0.11) <sup>Bb</sup>   | 6.74<br>(0.11) <sup>CDb</sup>   | 6.55<br>(0.72) <sup>Cbc</sup>  | 4.72<br>(0.19) <sup>Ba</sup>    | 1.65<br>(0.24) <sup>Aa</sup>    | 8.19<br>(0.70) <sup>Eab</sup>   | 7.58<br>(0.28) <sup>DEa</sup>  | 8.34<br>(0.16) <sup>Ea</sup>   | *** |
| Sig.           |    | ***                            | ***                            | ***                             | ***                            | ***                             | ***                            | ***                             | ***                             | ***                             | ***                            | ***                            |     |
| Chroma         | 0  | 22.85<br>(1.05) <sup>Ac</sup>  | 22.85<br>(1.05) <sup>Aa</sup>  | 22.85<br>(1.05) <sup>Ad</sup>   | 22.85<br>(1.05) <sup>Aa</sup>  | 22.85<br>(1.05) <sup>Ad</sup>   | 22.85<br>(1.05) <sup>Ac</sup>  | 22.85<br>(1.05) <sup>Ad</sup>   | 22.85<br>(1.05) <sup>Ae</sup>   | 22.85<br>(1.05) <sup>Aa</sup>   | 22.85<br>(1.05) <sup>Abc</sup> | 22.85<br>(1.05) <sup>Aa</sup>  | NS  |
|                | 1  | 23.13<br>(0.95) <sup>BCd</sup> | 14.2<br>(0.09) <sup>Ab</sup>   | 35.5<br>(2.81) <sup>Ee</sup>    | 24.1<br>(0.05) <sup>BCa</sup>  | 27.44<br>(1.54) <sup>De</sup>   | 21.97<br>(0.65) <sup>Bbc</sup> | 22.18<br>(0.79) <sup>Bd</sup>   | 13.6<br>(0.16) <sup>Aa</sup>    | 25.09<br>(0.79) <sup>CDb</sup>  | 21.6<br>(0.33) <sup>Bbc</sup>  | 22.67<br>(0.53) <sup>BCa</sup> | *** |
|                | 3  | 16.89<br>(0.14) <sup>Ba</sup>  | 17.32<br>(1.22) <sup>BCc</sup> | 14.78<br>(1.10) <sup>Ab</sup>   | 19.31<br>(0.91) <sup>CDb</sup> | 13.8<br>(1.24) <sup>Ab</sup>    | 20.67<br>(0.14) <sup>Db</sup>  | 20.59<br>(0.01) <sup>Dc</sup>   | 21.48<br>(0.08) <sup>Dd</sup>   | 21.41<br>(0.69) <sup>Da</sup>   | 21.22<br>(1.64) <sup>Db</sup>  | 29.32<br>(1.28) <sup>Eb</sup>  | *** |
|                | 7  | 20.45<br>(0.38) <sup>Db</sup>  | 16.04<br>(0.18) <sup>Abc</sup> | 17.82<br>(0.04) <sup>ABCb</sup> | 18.49<br>(2.12) <sup>Cb</sup>  | 18.41<br>(0.04) <sup>Cc</sup>   | 22.98<br>(1.23) <sup>Ec</sup>  | 18.09<br>(0.26) <sup>Bb</sup>   | 16.25<br>(0.05) <sup>ABbc</sup> | 22.03<br>(0.99) <sup>DEa</sup>  | 31.48<br>(0.01) <sup>Gd</sup>  | 28.47<br>(0.27) <sup>Fb</sup>  | *** |
|                | 14 | 19.82<br>(1.22) <sup>Fb</sup>  | 14.13<br>(0.22) <sup>Bb</sup>  | 18.28<br>(0.39) <sup>Dc</sup>   | 19.08<br>(0.78) <sup>EFb</sup> | 11.02<br>(0.03) <sup>Aa</sup>   | 17.51<br>(0.21) <sup>Da</sup>  | 16.22<br>(0.08) <sup>Ca</sup>   | 17.27<br>(0.28) <sup>CDc</sup>  | 25.33<br>(0.08) <sup>Hb</sup>   | 24.08<br>(0.41) <sup>Gc</sup>  | 28.97<br>(0.44) <sup>Ib</sup>  | *** |
|                | 21 | 21.05<br>(0.09) <sup>Ebc</sup> | 19.42<br>(0.15) <sup>Dd</sup>  | 10.64<br>(0.67) <sup>Aa</sup>   | 17.48<br>(1.08) <sup>Cb</sup>  | 17.37<br>(0.05) <sup>Cc</sup>   | 21.34<br>(0.74) <sup>Ebc</sup> | 19.50<br>(0.21) <sup>Dc</sup>   | 15.30<br>(0.30) <sup>Bb</sup>   | 21.24<br>(0.11) <sup>Ea</sup>   | 18.18<br>(1.46) <sup>CDa</sup> | 19.37<br>(0.11) <sup>Dc</sup>  | *** |
| Sig.           |    | ***                            | ***                            | ***                             | ***                            | ***                             | ***                            | ***                             | ***                             | ***                             | ***                            | ***                            |     |
| Hue an-<br>gle | 0  | 0.34<br>(0.02) <sup>Ab</sup>   | 0.34<br>(0.02) <sup>Aab</sup>  | 0.34<br>(0.02) <sup>Aa</sup>    | 0.34<br>(0.02) <sup>Ab</sup>   | 0.34<br>(0.02) <sup>Aa</sup>    | 0.34<br>(0.02) <sup>Ab</sup>   | 0.34<br>(0.02) <sup>Ab</sup>    | 0.34<br>(0.02) <sup>Ac</sup>    | 0.34<br>(0.02) <sup>Aa</sup>    | 0.34<br>(0.02) <sup>Aa</sup>   | 0.34<br>(0.02) <sup>Aa</sup>   | NS  |
|                | 1  | 0.42<br>(0.01) <sup>Dc</sup>   | 0.61<br>(0.01) <sup>Gd</sup>   | 0.42<br>(0.01) <sup>Dab</sup>   | 0.33<br>(0.01) <sup>Bb</sup>   | 0.45<br>(0.01) <sup>Ec</sup>    | 0.33<br>(0.01) <sup>Bb</sup>   | 0.35<br>(0.01) <sup>BCbc</sup>  | 0.29<br>(0.01) <sup>Ab</sup>    | 0.37<br>(0.01) <sup>Cab</sup>   | 0.49<br>(0.01) <sup>Fb</sup>   | 0.42<br>(0.01) <sup>Dc</sup>   | *** |
|                | 3  | 0.18<br>(0.01) <sup>Aa</sup>   | 0.57<br>(0.01) <sup>Ecd</sup>  | 0.34<br>(0.05) <sup>BCa</sup>   | 0.40<br>(0.03) <sup>Cc</sup>   | 0.35<br>(0.02) <sup>BCa</sup>   | 0.28<br>(0.01) <sup>Bab</sup>  | 0.32<br>(0.01) <sup>Bb</sup>    | 0.34<br>(0.02) <sup>BCd</sup>   | 0.51<br>(0.02) <sup>DEc</sup>   | 0.50<br>(0.03) <sup>Db</sup>   | 0.55<br>(0.01) <sup>DEd</sup>  | *** |
|                | 7  | 0.50<br>(0.01) <sup>Gd</sup>   | 0.39<br>(0.01) <sup>CDb</sup>  | 0.36<br>(0.01) <sup>Bab</sup>   | 0.42<br>(0.01) <sup>Ec</sup>   | 0.41<br>(0.01) <sup>DEbc</sup>  | 0.28<br>(0.02) <sup>Aab</sup>  | 0.38<br>(0.01) <sup>BCc</sup>   | 0.29<br>(0.01) <sup>Abc</sup>   | 0.37<br>(0.01) <sup>BCab</sup>  | 0.44<br>(0.01) <sup>Fb</sup>   | 0.45<br>(0.01) <sup>Fc</sup>   | *** |
|                | 14 | 0.40<br>(0.02) <sup>EFc</sup>  | 0.54<br>(0.04) <sup>Gc</sup>   | 0.34<br>(0.01) <sup>CDa</sup>   | 0.42<br>(0.01) <sup>Fc</sup>   | 0.51<br>(0.01) <sup>Gd</sup>    | 0.21<br>(0.05) <sup>Aa</sup>   | 0.36<br>(0.01) <sup>CDEbc</sup> | 0.25<br>(0.01) <sup>ABb</sup>   | 0.37<br>(0.01) <sup>DEFab</sup> | 0.30<br>(0.01) <sup>BCa</sup>  | 0.38<br>(0.01) <sup>DEFb</sup> | *** |
|                | 21 | 0.31<br>(0.01) <sup>Cb</sup>   | 0.31<br>(0.01) <sup>Ca</sup>   | 0.44<br>(0.06) <sup>Db</sup>    | 0.25<br>(0.01) <sup>BCa</sup>  | 0.39<br>(0.01) <sup>Db</sup>    | 0.30<br>(0.02) <sup>Cb</sup>   | 0.24<br>(0.01) <sup>Ba</sup>    | 0.10<br>(0.01) <sup>Aa</sup>    | 0.39<br>(0.01) <sup>Db</sup>    | 0.43<br>(0.05) <sup>Db</sup>   | 0.44<br>(0.01) <sup>Dc</sup>   | *** |

\*\*\*

<sup>A-H</sup>Mean values in the same row (corresponding to the same days of storage) not followed by a common uppercase letter differ significantly ( $p$ -value  $< 0.05$ ).

<sup>a-e</sup> Mean values in the same column (corresponding to the same treatment) not followed by a common lowercase letter differ significantly ( $p$ -value  $< 0.05$ ).

\*  $p$ -value  $< 0.05$ ; \*\*  $p$ -value  $< 0.01$ ; \*\*\*  $p$ -value  $< 0.001$ ; <sup>NS</sup> no significance ( $p$ -value  $> 0.05$ )
