# Supplementary material for: Effect of Chitosan and Alginate-Based Edible Membranes with Oregano Essential Oil and Olive Oil in the Microbiological, Physicochemical and Organoleptic Characteristics of Mutton
Source: MDPI journal article supplement (doi:10.3390/microorganisms11020507), 2023-02-17
Supplement: s1 [file s1]

**Supplementary Table S1.** Mean populations (in log<sub>10</sub> cfu/gr) of Total Mesophilic Counts, Total Psychrophilic Counts, *Brochothrix thermosphacta* and Lactic Acid Bacteria in meat pieces from shoulder region (standard deviation in parenthesis).

| Value | Storage<br>(Days) | Treatment                     |                                |                                 |                                 |                               |                                 |                                 |                                |                                |                                 |                                  | Sig. |
|-------|-------------------|-------------------------------|--------------------------------|---------------------------------|---------------------------------|-------------------------------|---------------------------------|---------------------------------|--------------------------------|--------------------------------|---------------------------------|----------------------------------|------|
|       |                   | Co                            | Ch                             | Ch + or                         | Ch + va                         | Ch + or<br>+ va               | Va                              | Al                              | Al + or                        | Al + va                        | Al + or +<br>va                 | Al + ol +<br>va                  |      |
| TMC   | 0                 | 5.74<br>(0.19) <sup>Aa</sup>  | 5.74<br>(0.19) <sup>Aab</sup>  | 5.74<br>(0.19) <sup>Aab</sup>   | 5.74<br>(0.19) <sup>Aabc</sup>  | 5.74<br>(0.19) <sup>Aa</sup>  | 5.74<br>(0.19) <sup>Aab</sup>   | 5.74<br>(0.19) <sup>Aa</sup>    | 5.74<br>(0.19) <sup>Aa</sup>   | 5.74<br>(0.19) <sup>Aa</sup>   | 5.74<br>(0.19) <sup>Aa</sup>    | 5.74<br>(0.19) <sup>Aa</sup>     | NS   |
|       | 1                 | 5.72<br>(0.17) <sup>Aa</sup>  | 4.50<br>(0.28) <sup>Aa</sup>   | 4.50<br>(0.7) <sup>Aa</sup>     | 5.53<br>(0.08) <sup>Aab</sup>   | 5.88<br>(0.15) <sup>Aa</sup>  | 5.30<br>(0.42) <sup>Aa</sup>    | 6.58<br>(1.25) <sup>Aab</sup>   | 6.08<br>(1.53) <sup>Aa</sup>   | 5.43<br>(0.36) <sup>Aa</sup>   | 7.30<br>(0.42) <sup>Aab</sup>   | 6.40<br>(0.7) <sup>Aab</sup>     | NS   |
|       | 3                 | 7.25<br>(0.49) <sup>Cb</sup>  | 4.58<br>(0.15) <sup>Aa</sup>   | 5.45<br>(0.77) <sup>ABab</sup>  | 5.03<br>(0.61) <sup>Aa</sup>    | 5.00<br>(0.01) <sup>Aa</sup>  | 6.80<br>(0.7) <sup>BCbc</sup>   | 7.23<br>(0.08) <sup>Cab</sup>   | 7.23<br>(0.08) <sup>Ca</sup>   | 7.54<br>(0.21) <sup>Cb</sup>   | 8.00<br>(0.01) <sup>Cb</sup>    | 7.73<br>(0.05) <sup>Cbc</sup>    | ***  |
|       | 7                 | 7.38<br>(0.55) <sup>BCb</sup> | 4.81<br>(0.04) <sup>Aa</sup>   | 6.80<br>(0.28) <sup>BCb</sup>   | 6.53<br>(0.08) <sup>ABCbc</sup> | 5.65<br>(0.91) <sup>ABa</sup> | 6.90<br>(0.01) <sup>BCbc</sup>  | 7.66<br>(0.26) <sup>Cab</sup>   | 7.69<br>(0.12) <sup>Ca</sup>   | 7.60<br>(0.01) <sup>Cb</sup>   | 7.40<br>(0.70) <sup>BCb</sup>   | 8.34<br>(0.70) <sup>Cc</sup>     | ***  |
|       | 14                | 7.84<br>(0.21) <sup>CDb</sup> | 6.37<br>(0.66) <sup>ABb</sup>  | 6.40<br>(0.70) <sup>ABCab</sup> | 6.72<br>(0.17) <sup>ABCDc</sup> | 5.65<br>(0.49) <sup>Aa</sup>  | 7.47<br>(0.01) <sup>BCDc</sup>  | 7.65<br>(0.06) <sup>BCDab</sup> | 7.90<br>(0.01) <sup>Da</sup>   | 7.30<br>(0.42) <sup>BCDb</sup> | 7.15<br>(0.21) <sup>BCDab</sup> | 7.12<br>(0.06) <sup>BCDabc</sup> | **   |
|       | 21                | 8.00<br>(0.01) <sup>Db</sup>  | 6.50<br>(0.28) <sup>ABCb</sup> | 7.15<br>(0.21) <sup>BCDb</sup>  | 6.15<br>(0.21) <sup>ABabc</sup> | 5.84<br>(0.21) <sup>Aa</sup>  | 7.15<br>(0.21) <sup>BCDbc</sup> | 7.95<br>(0.06) <sup>Db</sup>    | 8.00<br>(0.42) <sup>Da</sup>   | 8.06<br>(0.15) <sup>Db</sup>   | 7.30<br>(0.42) <sup>CDab</sup>  | 7.8<br>(0.28) <sup>Dbc</sup>     | ***  |
|       | Sig.              | ***                           | **                             | **                              | *                               | NS                            | ***                             | ***                             | NS                             | ***                            | ***                             | ***                              |      |
| TPC   | 0                 | 5.75<br>(0.02) <sup>Aa</sup>  | 5.75<br>(0.02) <sup>Aabc</sup> | 5.75<br>(0.02) <sup>Aab</sup>   | 5.75<br>(0.02) <sup>Aa</sup>    | 5.75<br>(0.02) <sup>Aa</sup>  | 5.75<br>(0.02) <sup>Aa</sup>    | 5.75<br>(0.02) <sup>Aa</sup>    | 5.75<br>(0.02) <sup>Aa</sup>   | 5.75<br>(0.02) <sup>Aa</sup>   | 5.75<br>(0.02) <sup>Aa</sup>    | 5.75<br>(0.02) <sup>Aa</sup>     | NS   |
|       | 1                 | 5.50<br>(0.70) <sup>ABa</sup> | 4.65<br>(0.91) <sup>Aa</sup>   | 4.65<br>(0.91) <sup>Aa</sup>    | 5.88<br>(0.15) <sup>ABab</sup>  | 5.34<br>(0.49) <sup>ABa</sup> | 5.73<br>(0.36) <sup>ABa</sup>   | 6.84<br>(1.50) <sup>ABab</sup>  | 6.50<br>(1.13) <sup>ABab</sup> | 5.93<br>(0.33) <sup>ABa</sup>  | 7.75<br>(0.21) <sup>Bb</sup>    | 6.45<br>(0.21) <sup>ABa</sup>    | *    |
|       | 3                 | 8.30<br>(0.56) <sup>Cb</sup>  | 5.32<br>(0.21) <sup>Aab</sup>  | 5.73<br>(0.61) <sup>Aab</sup>   | 6.43<br>(0.36) <sup>ABabc</sup> | 5.82<br>(0.91) <sup>Aa</sup>  | 7.87<br>(0.04) <sup>BCb</sup>   | 8.77<br>(0.10) <sup>Cb</sup>    | 8.30<br>(0.56) <sup>Cbc</sup>  | 8.10<br>(0.28) <sup>BCb</sup>  | 8.23<br>(0.33) <sup>Cbc</sup>   | 8.00<br>(0.01) <sup>BCb</sup>    | ***  |
|       | 7                 | 8.45<br>(0.63) <sup>BCb</sup> | 5.84<br>(0.21) <sup>Aabc</sup> | 7.34<br>(0.49) <sup>ABCbc</sup> | 7.53<br>(0.33) <sup>ABCc</sup>  | 6.84<br>(1.20) <sup>ABa</sup> | 7.82<br>(0.18) <sup>BCb</sup>   | 8.53<br>(0.33) <sup>BCb</sup>   | 8.66<br>(0.26) <sup>BCbc</sup> | 8.73<br>(0.05) <sup>BCb</sup>  | 8.45<br>(0.21) <sup>BCbc</sup>  | 8.80<br>(0.28) <sup>Cb</sup>     | **   |
|       | 14                | 8.69<br>(0.12) <sup>Cb</sup>  | 7.38<br>(0.55) <sup>ABc</sup>  | 7.15<br>(0.21) <sup>Abc</sup>   | 7.38<br>(0.55) <sup>ABbc</sup>  | 7.19<br>(0.28) <sup>Aa</sup>  | 8.45<br>(0.21) <sup>BCb</sup>   | 8.3<br>(0.01) <sup>BCab</sup>   | 8.95<br>(0.06) <sup>Cbc</sup>  | 8.17<br>(0.01) <sup>ABCb</sup> | 8.6<br>(0.01) <sup>Cbc</sup>    | 8.47<br>(0.01) <sup>Cb</sup>     | **   |
|       | 21                | 8.84<br>(0.21) <sup>BCb</sup> | 7.15<br>(0.21) <sup>ABbc</sup> | 8.58<br>(0.15) <sup>BCc</sup>   | 7.42<br>(0.59) <sup>ABbc</sup>  | 6.65<br>(0.06) <sup>Aa</sup>  | 8.12<br>(0.24) <sup>ABCb</sup>  | 9.50<br>(0.70) <sup>Cb</sup>    | 9.38<br>(0.86) <sup>Cc</sup>   | 8.73<br>(0.36) <sup>BCb</sup>  | 8.73<br>(0.36) <sup>BCc</sup>   | 8.73<br>(0.36) <sup>BCb</sup>    | **   |
|       | Sig.              | ***                           | ***                            | ***                             | ***                             | NS                            | ***                             | ***                             | ***                            | ***                            | ***                             | ***                              |      |

|                          |    |                                 |                                |                                 |                                 |                               |                                  |                                 |                                |                                  |                                  |                                 |     |
|--------------------------|----|---------------------------------|--------------------------------|---------------------------------|---------------------------------|-------------------------------|----------------------------------|---------------------------------|--------------------------------|----------------------------------|----------------------------------|---------------------------------|-----|
| <b>B. thermo-sphacta</b> | 0  | 4.55<br>(0.26) <sup>Aa</sup>    | 4.55<br>(0.26) <sup>Aa</sup>   | 4.55<br>(0.26) <sup>Aab</sup>   | 4.55<br>(0.26) <sup>Aa</sup>    | 4.55<br>(0.26) <sup>Aa</sup>  | 4.55<br>(0.26) <sup>Aa</sup>     | 4.55<br>(0.26) <sup>Aa</sup>    | 4.55<br>(0.26) <sup>Aa</sup>   | 4.55<br>(0.26) <sup>Aab</sup>    | 4.55<br>(0.26) <sup>Aa</sup>     | 4.55<br>(0.26) <sup>Aa</sup>    | NS  |
|                          | 1  | 4.50<br>(0.70) <sup>Aa</sup>    | 4.00<br>(0.98) <sup>Aa</sup>   | 3.95<br>(0.06) <sup>Aa</sup>    | 5.15<br>(0.63) <sup>Aab</sup>   | 5.03<br>(0.19) <sup>Aa</sup>  | 4.42<br>(0.59) <sup>Aa</sup>     | 4.50<br>(0.70) <sup>Aa</sup>    | 4.58<br>(0.15) <sup>Aa</sup>   | 4.50<br>(0.28) <sup>Aa</sup>     | 4.99<br>(0.12) <sup>Aab</sup>    | 4.53<br>(0.33) <sup>Aa</sup>    | NS  |
|                          | 3  | 5.77<br>(0.32) <sup>BCab</sup>  | 4.60<br>(0.42) <sup>ABa</sup>  | 5.27<br>(0.38) <sup>ABCab</sup> | 4.88<br>(0.58) <sup>ABab</sup>  | 4.47<br>(0.01) <sup>Aa</sup>  | 4.97<br>(0.28) <sup>ABa</sup>    | 5.73<br>(0.36) <sup>ABCab</sup> | 6.50<br>(0.14) <sup>Cb</sup>   | 5.50<br>(0.28) <sup>ABCabc</sup> | 5.62<br>(0.21) <sup>ABCbc</sup>  | 5.30<br>(0.01) <sup>ABCab</sup> | **  |
|                          | 7  | 6.50<br>(0.70) <sup>Cbc</sup>   | 4.38<br>(0.30) <sup>Aa</sup>   | 6.38<br>(0.12) <sup>BCb</sup>   | 5.47<br>(0.10) <sup>ABCab</sup> | 4.80<br>(0.70) <sup>ABa</sup> | 5.60<br>(0.01) <sup>ABCab</sup>  | 6.30<br>(0.42) <sup>BCbc</sup>  | 7.00<br>(0.01) <sup>Cbc</sup>  | 5.92<br>(0.10) <sup>ABCbc</sup>  | 6.53<br>(0.33) <sup>Cd</sup>     | 6.19<br>(0.70) <sup>BCb</sup>   | **  |
|                          | 14 | 7.00<br>(0.01) <sup>BCbc</sup>  | 5.58<br>(0.58) <sup>ABa</sup>  | 5.38<br>(1.11) <sup>ABab</sup>  | 6.57<br>(0.38) <sup>BCb</sup>   | 4.77<br>(0.10) <sup>Aa</sup>  | 5.60<br>(0.01) <sup>ABab</sup>   | 7.30<br>(0.01) <sup>Cbc</sup>   | 6.69<br>(0.30) <sup>BCb</sup>  | 6.03<br>(0.36) <sup>ABCc</sup>   | 5.69<br>(0.12) <sup>ABCbc</sup>  | 5.47<br>(0.01) <sup>ABab</sup>  | **  |
|                          | 21 | 7.77<br>(0.01) <sup>DEc</sup>   | 5.60<br>(0.91) <sup>ABCa</sup> | 6.65<br>(0.49) <sup>BCDEb</sup> | 5.50<br>(0.70) <sup>ABab</sup>  | 4.30<br>(0.42) <sup>Aa</sup>  | 6.32<br>(0.21) <sup>BCDEb</sup>  | 7.84<br>(0.21) <sup>Ec</sup>    | 7.47<br>(0.01) <sup>CDEc</sup> | 6.50<br>(0.58) <sup>BCDEc</sup>  | 5.90<br>(0.10) <sup>ABCDcd</sup> | 5.58<br>(0.58) <sup>ABCab</sup> | *** |
| <b>Sig.</b>              |    | ***                             | NS                             | ***                             | **                              | NS                            | *                                | ***                             | ***                            | **                               | **                               | *                               |     |
| <b>LAB</b>               | 0  | 2.00<br>(0.01) <sup>Aa</sup>    | 2.00<br>(0.01) <sup>Aa</sup>   | 2.00<br>(0.01) <sup>Aa</sup>    | 2.00<br>(0.01) <sup>Aa</sup>    | 2.00<br>(0.01) <sup>Aa</sup>  | 2.00<br>(0.01) <sup>Aa</sup>     | 2.00<br>(0.01) <sup>Aa</sup>    | 2.00<br>(0.01) <sup>Aa</sup>   | 2.00<br>(0.01) <sup>Aa</sup>     | 2.00<br>(0.01) <sup>Aa</sup>     | 2.00<br>(0.01) <sup>Aa</sup>    | NS  |
|                          | 1  | 2.50<br>(0.70) <sup>ABab</sup>  | 2.00<br>(0.01) <sup>Aa</sup>   | 2.00<br>(0.01) <sup>Aa</sup>    | 2.00<br>(0.01) <sup>Aa</sup>    | 2.00<br>(0.01) <sup>Aa</sup>  | 2.69<br>(0.98) <sup>ABab</sup>   | 4.19<br>(0.15) <sup>Bb</sup>    | 3.23<br>(0.33) <sup>ABb</sup>  | 3.08<br>(0.86) <sup>ABab</sup>   | 3.30<br>(0.98) <sup>ABab</sup>   | 4.12<br>(0.06) <sup>ABb</sup>   | *   |
|                          | 3  | 4.19<br>(0.58) <sup>BCabc</sup> | 2.00<br>(0.01) <sup>Aa</sup>   | 2.70<br>(1.04) <sup>ABab</sup>  | 2.00<br>(0.01) <sup>Aa</sup>    | 2.00<br>(0.01) <sup>Aa</sup>  | 3.65<br>(0.49) <sup>ABCabc</sup> | 4.67<br>(0.7) <sup>Cb</sup>     | 3.95<br>(0.06) <sup>BCb</sup>  | 4.32<br>(0.21) <sup>BCbc</sup>   | 4.23<br>(0.08) <sup>BCbc</sup>   | 4.23<br>(0.33) <sup>BCb</sup>   | **  |
|                          | 7  | 3.97<br>(0.7) <sup>Aabc</sup>   | 3.45<br>(0.77) <sup>Aab</sup>  | 4.38<br>(0.12) <sup>Abc</sup>   | 3.38<br>(1.28) <sup>Aab</sup>   | 3.53<br>(1.75) <sup>Aab</sup> | 3.8<br>(0.14) <sup>Aabc</sup>    | 4.9<br>(0.01) <sup>Ab</sup>     | 3.15<br>(0.21) <sup>Ab</sup>   | 4.95<br>(0.06) <sup>Ac</sup>     | 4.73<br>(0.05) <sup>Abc</sup>    | 5.15<br>(0.21) <sup>Ab</sup>    | NS  |
|                          | 14 | 4.40<br>(0.70) <sup>ABCbc</sup> | 4.80<br>(0.70) <sup>ABCb</sup> | 4.86<br>(0.44) <sup>ABCc</sup>  | 5.15<br>(0.21) <sup>ABCb</sup>  | 5.38<br>(0.55) <sup>BCb</sup> | 4.05<br>(0.08) <sup>ABbc</sup>   | 5.11<br>(0.01) <sup>ABCb</sup>  | 3.77<br>(0.10) <sup>Ab</sup>   | 5.40<br>(0.41) <sup>BCc</sup>    | 5.02<br>(0.02) <sup>ABCc</sup>   | 5.77<br>(0.10) <sup>Cb</sup>    | *   |
|                          | 21 | 5.00<br>(0.01) <sup>Ac</sup>    | 4.77<br>(0.32) <sup>Ab</sup>   | 5.45<br>(0.21) <sup>Ac</sup>    | 5.34<br>(0.49) <sup>Ab</sup>    | 5.69<br>(0.12) <sup>Ab</sup>  | 5.15<br>(0.21) <sup>Ac</sup>     | 5.00<br>(0.01) <sup>Ab</sup>    | 5.53<br>(0.33) <sup>Ac</sup>   | 5.08<br>(0.55) <sup>Ac</sup>     | 5.32<br>(0.21) <sup>Ac</sup>     | 4.57<br>(1.79) <sup>Ab</sup>    | NS  |
| <b>Sig.</b>              |    | ***                             | ***                            | ***                             | ***                             | ***                           | ***                              | ***                             | ***                            | ***                              | ***                              | ***                             |     |

Treatment: Co: Control; Ch: Chitosan; Ch + or: Chitosan + oregano; Ch + va: Chitosan + vacuum; Ch + or + va: Chitosan + oregano + vacuum; Va: Vacuum; Al: Alginate; Al + or: Alginate + oregano; Al + va: Alginate + vacuum; Al + or + va: Alginate + oregano + vacuum; Al + ol + va: Alginate + olive + vacuum.

A-E Mean values in the same row (corresponding to the same days of storage) not followed by a common uppercase letter differ significantly (p-value < 0.05).

a-d Mean values in the same column (corresponding to the same treatment) not followed by a common lowercase letter differ significantly (p-value < 0.05).

\* p-value < 0.05; \*\* p-value < 0.01; \*\*\* p-value < 0.001; NS no significance (p-value > 0.05)
