# Supplementary material for: Effect of Chitosan and Alginate-Based Edible Membranes with Oregano Essential Oil and Olive Oil in the Microbiological, Physicochemical and Organoleptic Characteristics of Mutton
Source: MDPI journal article supplement (doi:10.3390/microorganisms11020507), 2023-02-17
Supplement: s1 [file s1]

**Supplementary Table S4.** Mean colour values of meat pieces from thigh area (standard deviation in parenthesis).

| Lot         | Storage<br>(Days) | Treatment                                  |                                             |                                           |                                            |                                             |                                            |                                            |                                            |                                            |                                           |                                             | Sig. |
|-------------|-------------------|--------------------------------------------|---------------------------------------------|-------------------------------------------|--------------------------------------------|---------------------------------------------|--------------------------------------------|--------------------------------------------|--------------------------------------------|--------------------------------------------|-------------------------------------------|---------------------------------------------|------|
|             |                   | Co                                         | Ch                                          | Ch + Or                                   | Ch + Va                                    | Ch + Or +<br>Va                             | Va                                         | Al                                         | Al + Or                                    | Al + Va                                    | Al + Or +<br>Va                           | Al + Ol +<br>Va                             |      |
| <b>L*</b>   | 0                 | 42.14<br>(1.45) <sup>Ab</sup>              | 42.14<br>(1.45) <sup>Ab</sup>               | 42.14<br>(1.45) <sup>Ab</sup>             | 42.14<br>(1.45) <sup>Aa</sup>              | 42.14<br>(1.45) <sup>Ac</sup>               | 42.14<br>(1.45) <sup>Ac</sup>              | 42.14<br>(1.45) <sup>Ac</sup>              | 42.14<br>(1.45) <sup>Ac</sup>              | 42.14<br>(1.45) <sup>Ac</sup>              | 42.14<br>(1.45) <sup>Ab</sup>             | 42.14<br>(1.45) <sup>Abc</sup>              | NS   |
|             | 1                 | 47.40<br>(2.40) <sup>EFc</sup>             | 42.10<br>(0.50) <sup>D<sub>bc</sub></sup>   | 49.17<br>(0.94) <sup>F<sub>d</sub></sup>  | 46.70<br>(0.02) <sup>E<sub>b</sub></sup>   | 37.16<br>(0.20) <sup>Aa</sup>               | 38.10<br>(0.70) <sup>AB<sub>b</sub></sup>  | 37.30<br>(0.69) <sup>A<sub>ab</sub></sup>  | 40.80<br>(0.45) <sup>CD<sub>bc</sub></sup> | 40.03<br>(0.03) <sup>BC<sub>b</sub></sup>  | 41.26<br>(0.35) <sup>CD<sub>b</sub></sup> | 40.46<br>(0.12) <sup>CD<sub>b</sub></sup>   | ***  |
|             | 3                 | 37.77<br>(0.38) <sup>CD<sub>a</sub></sup>  | 44.21<br>(0.14) <sup>F<sub>bc</sub></sup>   | 41.85<br>(0.62) <sup>E<sub>b</sub></sup>  | 49.18<br>(0.86) <sup>G<sub>b</sub></sup>   | 55.19<br>(0.48) <sup>H<sub>d</sub></sup>    | 38.28<br>(1.23) <sup>D<sub>b</sub></sup>   | 35.08<br>(0.89) <sup>B<sub>a</sub></sup>   | 35.31<br>(1.64) <sup>B<sub>a</sub></sup>   | 33.15<br>(0.30) <sup>A<sub>a</sub></sup>   | 36.28<br>(0.43) <sup>BC<sub>a</sub></sup> | 43.23<br>(0.25) <sup>EF<sub>bc</sub></sup>  | ***  |
|             | 7                 | 41.59<br>(1.27) <sup>C<sub>b</sub></sup>   | 44.25<br>(0.88) <sup>DE<sub>c</sub></sup>   | 38.72<br>(0.07) <sup>AB<sub>a</sub></sup> | 46.32<br>(0.14) <sup>E<sub>b</sub></sup>   | 37.97<br>(0.70) <sup>AB<sub>ab</sub></sup>  | 40.51<br>(0.54) <sup>BC<sub>bc</sub></sup> | 37.10<br>(1.40) <sup>A<sub>ab</sub></sup>  | 42.60<br>(0.20) <sup>CD<sub>c</sub></sup>  | 38.50<br>(0.01) <sup>AB<sub>b</sub></sup>  | 38.40<br>(1.96) <sup>AB<sub>a</sub></sup> | 49.18<br>(1.85) <sup>F<sub>d</sub></sup>    | ***  |
|             | 14                | 46.29<br>(0.11) <sup>E<sub>c</sub></sup>   | 39.39<br>(0.19) <sup>B<sub>a</sub></sup>    | 38.48<br>(0.31) <sup>AB<sub>a</sub></sup> | 48.17<br>(1.91) <sup>CD<sub>a</sub></sup>  | 36.47<br>(0.13) <sup>Aa</sup>               | 42.86<br>(0.55) <sup>D<sub>c</sub></sup>   | 51.72<br>(1.95) <sup>F<sub>d</sub></sup>   | 38.41<br>(1.01) <sup>AB<sub>b</sub></sup>  | 40.37<br>(1.05) <sup>BC<sub>bc</sub></sup> | 43.46<br>(0.04) <sup>D<sub>b</sub></sup>  | 43.35<br>(1.13) <sup>D<sub>c</sub></sup>    | ***  |
|             | 21                | 41.70<br>(0.06) <sup>FG<sub>b</sub></sup>  | 43.12<br>(0.84) <sup>GH<sub>bc</sub></sup>  | 44.05<br>(0.2) <sup>H<sub>c</sub></sup>   | 40.43<br>(1.65) <sup>DE<sub>Fa</sub></sup> | 39.88<br>(1.65) <sup>DE<sub>Fbc</sub></sup> | 35.18<br>(0.98) <sup>A<sub>a</sub></sup>   | 38.69<br>(0.07) <sup>CD<sub>b</sub></sup>  | 41.07<br>(0.05) <sup>EF<sub>c</sub></sup>  | 39.29<br>(0.59) <sup>CDE<sub>b</sub></sup> | 37.68<br>(0.57) <sup>BC<sub>a</sub></sup> | 35.83<br>(0.43) <sup>AB<sub>a</sub></sup>   | ***  |
| <b>Sig.</b> |                   | ***                                        | **                                          | ***                                       | ***                                        | ***                                         | ***                                        | ***                                        | ***                                        | ***                                        | ***                                       | ***                                         |      |
| <b>a*</b>   | 0                 | 22.62<br>(0.22) <sup>Ad</sup>              | 22.62<br>(0.22) <sup>Ac</sup>               | 22.62<br>(0.22) <sup>Af</sup>             | 22.62<br>(0.22) <sup>Ae</sup>              | 22.62<br>(0.22) <sup>Ae</sup>               | 22.62<br>(0.22) <sup>Ac</sup>              | 22.62<br>(0.22) <sup>Ad</sup>              | 22.62<br>(0.22) <sup>Ac</sup>              | 22.62<br>(0.22) <sup>Ac</sup>              | 22.62<br>(0.22) <sup>Ab</sup>             | 22.62<br>(0.22) <sup>Ac</sup>               | NS   |
|             | 1                 | 16.61<br>(0.03) <sup>Aa</sup>              | 20.17<br>(0.73) <sup>D<sub>b</sub></sup>    | 17.00<br>(0.45) <sup>Ac</sup>             | 17.34<br>(0.32) <sup>AB<sub>c</sub></sup>  | 18.83<br>(0.11) <sup>C<sub>c</sub></sup>    | 18.21<br>(0.12) <sup>BC<sub>ab</sub></sup> | 22.8<br>(0.02) <sup>E<sub>d</sub></sup>    | 22.28<br>(0.19) <sup>E<sub>bc</sub></sup>  | 21.14<br>(0.05) <sup>D<sub>b</sub></sup>   | 22.68<br>(0.94) <sup>E<sub>b</sub></sup>  | 17.33<br>(0.56) <sup>AB<sub>a</sub></sup>   | ***  |
|             | 3                 | 20.66<br>(0.41) <sup>DEF<sub>c</sub></sup> | 21.22<br>(0.36) <sup>EF<sub>b</sub></sup>   | 21.91<br>(0.28) <sup>FG<sub>e</sub></sup> | 25.92<br>(0.03) <sup>H<sub>f</sub></sup>   | 9.78<br>(0.07) <sup>Aa</sup>                | 18.46<br>(0.67) <sup>BC<sub>ab</sub></sup> | 16.33<br>(0.68) <sup>B<sub>a</sub></sup>   | 18.75<br>(2.78) <sup>CD<sub>ab</sub></sup> | 17.74<br>(0.61) <sup>BC<sub>a</sub></sup>  | 23.73<br>(0.18) <sup>G<sub>b</sub></sup>  | 19.53<br>(0.16) <sup>CDE<sub>ab</sub></sup> | ***  |
|             | 7                 | 16.72<br>(0.38) <sup>Aa</sup>              | 20.27<br>(0.95) <sup>BCDE<sub>b</sub></sup> | 18.17<br>(0.24) <sup>AB<sub>d</sub></sup> | 21.69<br>(0.16) <sup>DE<sub>d</sub></sup>  | 18.60<br>(0.42) <sup>ABC<sub>c</sub></sup>  | 19.53<br>(0.21) <sup>BCD<sub>b</sub></sup> | 20.61<br>(0.77) <sup>CDE<sub>c</sub></sup> | 18.02<br>(1.38) <sup>AB<sub>a</sub></sup>  | 20.70<br>(0.04) <sup>CDE<sub>b</sub></sup> | 22.02<br>(1.80) <sup>E<sub>b</sub></sup>  | 21.05<br>(2.02) <sup>CDE<sub>bc</sub></sup> | *    |
|             | 14                | 19.75<br>(0.22) <sup>D<sub>b</sub></sup>   | 13.43<br>(0.21) <sup>Aa</sup>               | 13.26<br>(0.25) <sup>Ab</sup>             | 16.46<br>(0.19) <sup>B<sub>b</sub></sup>   | 16.04<br>(0.07) <sup>B<sub>b</sub></sup>    | 22.21<br>(0.25) <sup>EF<sub>c</sub></sup>  | 17.97<br>(0.16) <sup>C<sub>b</sub></sup>   | 23.58<br>(1.83) <sup>F<sub>c</sub></sup>   | 21.99<br>(0.09) <sup>E<sub>c</sub></sup>   | 22.12<br>(0.31) <sup>EF<sub>b</sub></sup> | 22.32<br>(0.75) <sup>EF<sub>c</sub></sup>   | ***  |
|             | 21                | 20.14<br>(0.14) <sup>E<sub>bc</sub></sup>  | 14.19<br>(0.12) <sup>Ba</sup>               | 12.15<br>(0.01) <sup>Aa</sup>             | 15.55<br>(0.43) <sup>Ca</sup>              | 21.68<br>(0.25) <sup>F<sub>d</sub></sup>    | 17.64<br>(1.53) <sup>Da</sup>              | 17.31<br>(0.01) <sup>D<sub>ab</sub></sup>  | 15.05<br>(0.06) <sup>Ca</sup>              | 17.69<br>(0.24) <sup>Da</sup>              | 15.32<br>(0.47) <sup>BC<sub>a</sub></sup> | 17.43<br>(0.02) <sup>Da</sup>               | ***  |
| <b>Sig.</b> |                   | ***                                        | ***                                         | ***                                       | ***                                        | ***                                         | ***                                        | ***                                        | ***                                        | ***                                        | ***                                       | ***                                         |      |
| <b>b*</b>   | 0                 | 6.55<br>(1.03) <sup>A<sub>ab</sub></sup>   | 6.55<br>(1.03) <sup>Ab</sup>                | 6.55<br>(1.03) <sup>Ab</sup>              | 6.55<br>(1.03) <sup>Aa</sup>               | 6.55<br>(1.03) <sup>Ac</sup>                | 6.55<br>(1.03) <sup>Ab</sup>               | 6.55<br>(1.03) <sup>Ab</sup>               | 6.55<br>(1.03) <sup>Aa</sup>               | 6.55<br>(1.03) <sup>A<sub>ab</sub></sup>   | 6.55<br>(1.03) <sup>Ab</sup>              | 6.55<br>(1.03) <sup>Ab</sup>                | NS   |

|                        |    |                                 |                                 |                                |                                 |                                 |                                  |                                 |                                  |                                 |                                 |                                |     |
|------------------------|----|---------------------------------|---------------------------------|--------------------------------|---------------------------------|---------------------------------|----------------------------------|---------------------------------|----------------------------------|---------------------------------|---------------------------------|--------------------------------|-----|
|                        | 1  | 5.80<br>(0.01) <sup>Ca</sup>    | 4.91<br>(0.09) <sup>ABa</sup>   | 6.72<br>(0.16) <sup>Db</sup>   | 6.68<br>(0.53) <sup>Da</sup>    | 5.33<br>(0.01) <sup>BCb</sup>   | 4.58<br>(0.09) <sup>Aa</sup>     | 10.28<br>(0.30) <sup>Gc</sup>   | 9.03<br>(0.12) <sup>Fb</sup>     | 11.20<br>(0.13) <sup>Hc</sup>   | 7.75<br>(0.19) <sup>Eb</sup>    | 5.77<br>(0.54) <sup>Cb</sup>   | *** |
|                        | 3  | 7.02<br>(0.09) <sup>CDEFb</sup> | 5.30<br>(0.14) <sup>ABCa</sup>  | 8.34<br>(0.25) <sup>Fc</sup>   | 7.77<br>(2.62) <sup>DEFa</sup>  | 3.29<br>(0.01) <sup>Aa</sup>    | 6.41<br>(0.67) <sup>BCDEFb</sup> | 4.21<br>(0.22) <sup>ABa</sup>   | 5.95<br>(1.44) <sup>BCDEa</sup>  | 5.54<br>(0.28) <sup>BCDa</sup>  | 6.96<br>(0.01) <sup>CDEFb</sup> | 8.00<br>(0.43) <sup>EFc</sup>  | *   |
|                        | 7  | 5.67<br>(0.26) <sup>Ba</sup>    | 6.50<br>(0.05) <sup>BCDb</sup>  | 6.16<br>(0.71) <sup>BCb</sup>  | 8.47<br>(0.02) <sup>Ea</sup>    | 4.65<br>(0.32) <sup>Ab</sup>    | 6.80<br>(0.13) <sup>CDb</sup>    | 4.64<br>(0.02) <sup>Aa</sup>    | 6.18<br>(0.03) <sup>CDa</sup>    | 6.10<br>(0.15) <sup>BCab</sup>  | 7.29<br>(0.81) <sup>Db</sup>    | 11.93<br>(0.26) <sup>Fd</sup>  | *** |
|                        | 14 | 5.86<br>(0.20) <sup>Ba</sup>    | 7.16<br>(0.11) <sup>Cb</sup>    | 4.45<br>(0.12) <sup>Aa</sup>   | 8.62<br>(0.70) <sup>Da</sup>    | 4.49<br>(0.15) <sup>Ab</sup>    | 4.49<br>(0.30) <sup>Aa</sup>     | 9.11<br>(0.72) <sup>DEc</sup>   | 6.05<br>(0.19) <sup>Ba</sup>     | 7.38<br>(0.59) <sup>Cb</sup>    | 9.65<br>(0.14) <sup>Ec</sup>    | 8.59<br>(0.43) <sup>Dc</sup>   | *** |
|                        | 21 | 6.74<br>(0.04) <sup>Dab</sup>   | 6.65<br>(0.03) <sup>Db</sup>    | 7.50<br>(0.09) <sup>Dbc</sup>  | 7.04<br>(0.71) <sup>Da</sup>    | 8.94<br>(0.20) <sup>Ed</sup>    | 3.17<br>(1.11) <sup>Ba</sup>     | 4.12<br>(0.19) <sup>Ba</sup>    | 6.67<br>(0.15) <sup>Da</sup>     | 5.62<br>(0.16) <sup>Ca</sup>    | 2.10<br>(0.44) <sup>Aa</sup>    | 4.14<br>(0.30) <sup>Ba</sup>   | *** |
| <b>Sig.</b>            |    | *                               | ***                             | ***                            | ***                             | ***                             | ***                              | ***                             | ***                              | ***                             | ***                             | ***                            |     |
| <b>Chroma</b>          | 0  | 23.56<br>(0.49) <sup>Ad</sup>   | 23.56<br>(0.49) <sup>Ac</sup>   | 23.56<br>(0.49) <sup>Ac</sup>  | 23.56<br>(0.49) <sup>Ac</sup>   | 23.56<br>(0.49) <sup>Ad</sup>   | 23.56<br>(0.49) <sup>Ad</sup>    | 23.56<br>(0.49) <sup>Ac</sup>   | 23.56<br>(0.49) <sup>Ab</sup>    | 23.56<br>(0.49) <sup>Ac</sup>   | 23.56<br>(0.49) <sup>Ab</sup>   | 23.56<br>(0.49) <sup>Ac</sup>  | NS  |
|                        | 1  | 17.59<br>(0.02) <sup>Aa</sup>   | 20.76<br>(0.73) <sup>Db</sup>   | 18.28<br>(0.48) <sup>ABb</sup> | 18.58<br>(0.49) <sup>ABCb</sup> | 19.56<br>(0.11) <sup>Cc</sup>   | 18.78<br>(0.09) <sup>BCab</sup>  | 25.01<br>(0.1) <sup>Ed</sup>    | 24.04<br>(0.22) <sup>Eb</sup>    | 23.92<br>(0.01) <sup>Ec</sup>   | 23.96<br>(0.96) <sup>Eb</sup>   | 18.26<br>(0.70) <sup>ABa</sup> | *** |
|                        | 3  | 21.82<br>(0.42) <sup>DEc</sup>  | 21.87<br>(0.39) <sup>DEb</sup>  | 23.44<br>(0.36) <sup>EFc</sup> | 27.12<br>(0.78) <sup>Gd</sup>   | 10.32<br>(0.06) <sup>Aa</sup>   | 19.54<br>(0.86) <sup>CDab</sup>  | 16.86<br>(0.72) <sup>Ba</sup>   | 19.67<br>(3.09) <sup>CDa</sup>   | 18.58<br>(0.67) <sup>BCa</sup>  | 24.72<br>(0.17) <sup>Fb</sup>   | 21.11<br>(0.31) <sup>DEb</sup> | *** |
|                        | 7  | 17.65<br>(0.44) <sup>Aa</sup>   | 21.29<br>(0.89) <sup>BCDb</sup> | 19.19<br>(0.45) <sup>ABb</sup> | 23.29<br>(0.14) <sup>DEc</sup>  | 19.17<br>(0.49) <sup>ABc</sup>  | 20.68<br>(0.24) <sup>BCbc</sup>  | 21.12<br>(0.75) <sup>BCEb</sup> | 19.05<br>(1.29) <sup>ABa</sup>   | 21.58<br>(0.01) <sup>CDb</sup>  | 23.2<br>(1.96) <sup>DEb</sup>   | 24.21<br>(1.63) <sup>Ec</sup>  | **  |
|                        | 14 | 20.60<br>(0.27) <sup>Db</sup>   | 16.22<br>(0.13) <sup>ABa</sup>  | 13.98<br>(0.28) <sup>Aa</sup>  | 18.58<br>(0.49) <sup>Cb</sup>   | 16.66<br>(0.03) <sup>Bb</sup>   | 22.66<br>(0.30) <sup>Ecd</sup>   | 20.15<br>(0.47) <sup>Db</sup>   | 24.34<br>(1.82) <sup>Fb</sup>    | 23.19<br>(0.28) <sup>EFc</sup>  | 24.13<br>(0.34) <sup>EFb</sup>  | 23.92<br>(0.86) <sup>EFc</sup> | *** |
|                        | 21 | 21.23<br>(0.14) <sup>Fbc</sup>  | 15.67<br>(0.09) <sup>BCa</sup>  | 14.28<br>(0.03) <sup>Aa</sup>  | 17.07<br>(0.68) <sup>Da</sup>   | 23.45<br>(0.31) <sup>Gd</sup>   | 17.93<br>(1.70) <sup>DEa</sup>   | 17.79<br>(0.03) <sup>DEa</sup>  | 16.87<br>(0.01) <sup>Ca</sup>    | 18.56<br>(0.27) <sup>Ea</sup>   | 15.47<br>(0.40) <sup>ABa</sup>  | 17.91<br>(0.09) <sup>DEa</sup> | *** |
| <b>Sig.</b>            |    | ***                             | ***                             | ***                            | ***                             | ***                             | ***                              | ***                             | ***                              | ***                             | ***                             | ***                            |     |
| <b>Hue an-<br/>gle</b> | 0  | 0.28<br>(0.03) <sup>Aa</sup>    | 0.28<br>(0.03) <sup>Aab</sup>   | 0.28<br>(0.03) <sup>Aa</sup>   | 0.28<br>(0.03) <sup>Aa</sup>    | 0.28<br>(0.03) <sup>Aa</sup>    | 0.28<br>(0.03) <sup>Acd</sup>    | 0.28<br>(0.03) <sup>Ab</sup>    | 0.28<br>(0.03) <sup>Aab</sup>    | 0.28<br>(0.03) <sup>Aa</sup>    | 0.28<br>(0.03) <sup>Ab</sup>    | 0.28<br>(0.03) <sup>Aab</sup>  | NS  |
|                        | 1  | 0.33<br>(0.01) <sup>Cc</sup>    | 0.23<br>(0.01) <sup>Aa</sup>    | 0.37<br>(0.01) <sup>Db</sup>   | 0.36<br>(0.02) <sup>Dab</sup>   | 0.27<br>(0.01) <sup>Ba</sup>    | 0.24<br>(0.01) <sup>Abc</sup>    | 0.42<br>(0.01) <sup>Ec</sup>    | 0.38<br>(0.01) <sup>Dcd</sup>    | 0.48<br>(0.01) <sup>Fb</sup>    | 0.32<br>(0.01) <sup>Cb</sup>    | 0.32<br>(0.01) <sup>Cbc</sup>  | *** |
|                        | 3  | 0.32<br>(0.01) <sup>CDEbc</sup> | 0.24<br>(0.01) <sup>Aa</sup>    | 0.36<br>(0.01) <sup>DEb</sup>  | 0.29<br>(0.09) <sup>ABCDa</sup> | 0.32<br>(0.01) <sup>BCDEb</sup> | 0.33<br>(0.02) <sup>CDEd</sup>   | 0.25<br>(0.01) <sup>ABab</sup>  | 0.30<br>(0.02) <sup>ABCDab</sup> | 0.30<br>(0.01) <sup>ABCDa</sup> | 0.28<br>(0.01) <sup>ABCb</sup>  | 0.38<br>(0.01) <sup>Ec</sup>   | *   |
|                        | 7  | 0.32<br>(0.01) <sup>CDbc</sup>  | 0.31<br>(0.01) <sup>Cb</sup>    | 0.32<br>(0.03) <sup>CDab</sup> | 0.37<br>(0.01) <sup>Dab</sup>   | 0.24<br>(0.01) <sup>ABa</sup>   | 0.33<br>(0.01) <sup>CDd</sup>    | 0.22<br>(0.01) <sup>Aa</sup>    | 0.33<br>(0.02) <sup>CDbc</sup>   | 0.28<br>(0.01) <sup>BCa</sup>   | 0.31<br>(0.01) <sup>Cb</sup>    | 0.51<br>(0.05) <sup>Ed</sup>   | *** |
|                        | 14 | 0.28<br>(0.01) <sup>CDab</sup>  | 0.48<br>(0.01) <sup>Gd</sup>    | 0.32<br>(0.01) <sup>Dab</sup>  | 0.48<br>(0.02) <sup>Gb</sup>    | 0.27<br>(0.01) <sup>BCa</sup>   | 0.19<br>(0.01) <sup>Aab</sup>    | 0.46<br>(0.02) <sup>Gc</sup>    | 0.25<br>(0.01) <sup>Ba</sup>     | 0.32<br>(0.02) <sup>Da</sup>    | 0.41<br>(0.01) <sup>Fc</sup>    | 0.36<br>(0.01) <sup>Ec</sup>   | *** |
|                        | 21 | 0.32<br>(0.01) <sup>Cabc</sup>  | 0.43<br>(0.01) <sup>Dc</sup>    | 0.55<br>(0.01) <sup>Ec</sup>   | 0.42<br>(0.02) <sup>Db</sup>    | 0.39<br>(0.01) <sup>Dc</sup>    | 0.17<br>(0.04) <sup>Aa</sup>     | 0.23<br>(0.01) <sup>Bab</sup>   | 0.40<br>(0.01) <sup>Dd</sup>     | 0.30<br>(0.01) <sup>Ca</sup>    | 0.13<br>(0.03) <sup>Aa</sup>    | 0.23<br>(0.01) <sup>Ba</sup>   | *** |

\*\*\*

A-H Mean values in the same row (corresponding to the same days of storage) not followed by a common uppercase letter differ significantly ( $p$ -value  $< 0.05$ ).

a-f Mean values in the same column (corresponding to the same treatment) not followed by a common lowercase letter differ significantly (p-value < 0.05).

\* p-value < 0.05; \*\* p-value < 0.01; \*\*\* p-value < 0.001; NS no significance (p-value > 0.05)
